# Supplementary material
Source: ML conference proceedings conference paper supplement (https://openaccess.thecvf.com/content/WACV2023/html/Mehl_M-FUSE_Multi-Frame_Fusion_WACV_2023_paper.html)
Supplement: Supplementary file 1 [file Mehl_M-FUSE_Multi-Frame_Fusion_WACV_2023_supplemental.pdf]

# M-FUSE: Multi-frame Fusion for Scene Flow Estimation

## Supplementary Material

In this supplementary material, we provide a visualization of our fusion U-Net, additional ablations and additional qualitative results.

### 1. Architecture of the U-Net

Figure 1 shows the architecture of our 3-level U-Net with residual connections.

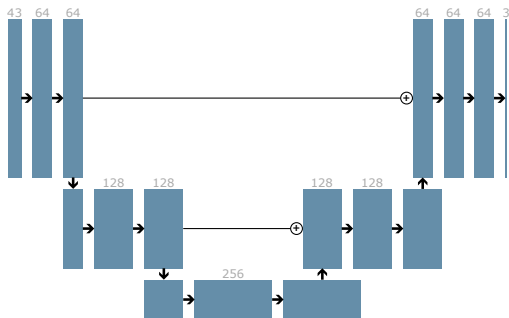

Figure 1. Architecture of our fusion U-Net.

### 2. Additional ablations

In addition to the ablations in the main paper, we conducted two more experiments as shown in Table 1.

**In-between convolutions.** As can be seen in Figure 1, in every depth level for the contracting as well as the expanding part one additional in-between convolutional layer is used to process information. Thus, we performed an ablation over several options: completely omitting this layer (none), having one (1 conv) or two (2 convs) convolutions, or using a residual block [1] (resblock). The results for none, one or two convolutional layers are inconclusive, with no significant best option. As a compromise, we chose one convolutional layer for our method since it is most similar to other U-Nets in the literature. Finally, despite being most closely related to the two convolutions, the residual block slightly decreases the quality compared to all other cases.

**Image features.** Finally, we compare two options to encode image-related features guiding our fusion module. The first option is to utilize the learned correlation cost from our baseline, which is upsampled from 1/8th of the resolution.

Table 1. Additional ablations. We show 4-fold cross validation results on KITTI *train* in terms of the D2, F1 and SF errors as well as the number of parameters in millions.

|                         | D2          | F1          | SF          | #param |
|-------------------------|-------------|-------------|-------------|--------|
| two-frame               | 1.81        | 3.67        | 4.07        |        |
| <i>In-between convs</i> |             |             |             |        |
| none                    | <b>1.99</b> | 3.33        | 3.89        | 1.42   |
| 1 conv (ours)           | <b>1.99</b> | 3.21        | <b>3.82</b> | 2.38   |
| 2 convs                 | 2.06        | <b>3.19</b> | 3.84        | 3.34   |
| resblock                | 2.08        | 3.47        | 3.99        | 3.34   |
| <i>Image features</i>   |             |             |             |        |
| corrCost (ours)         | <b>1.99</b> | <b>3.21</b> | <b>3.82</b> | 2.38   |
| BCE                     | 2.00        | 3.33        | 3.96        | 2.38   |

The second option is a full-resolution brightness constancy error map [2] as the  $L_2$  distance between the warped and original image. As one can see, the learned correlation features outperform the brightness constancy maps slightly – although the former are upsampled from lower resolution.

### 3. Additional qualitative results

We show additional visual results from the KITTI benchmark in Figures 2–5.

### References

- [1] K. He, X. Zhang, S. Ren, and J. Sun. Deep residual learning for image recognition. In *CVPR*, 2016.
- [2] Z. Ren, O. Gallo, D. Sun, M. Yand, E. B. Sudderth, and J. Kautz. A fusion approach for multi-frame optical flow estimation. In *WACV*, 2019.

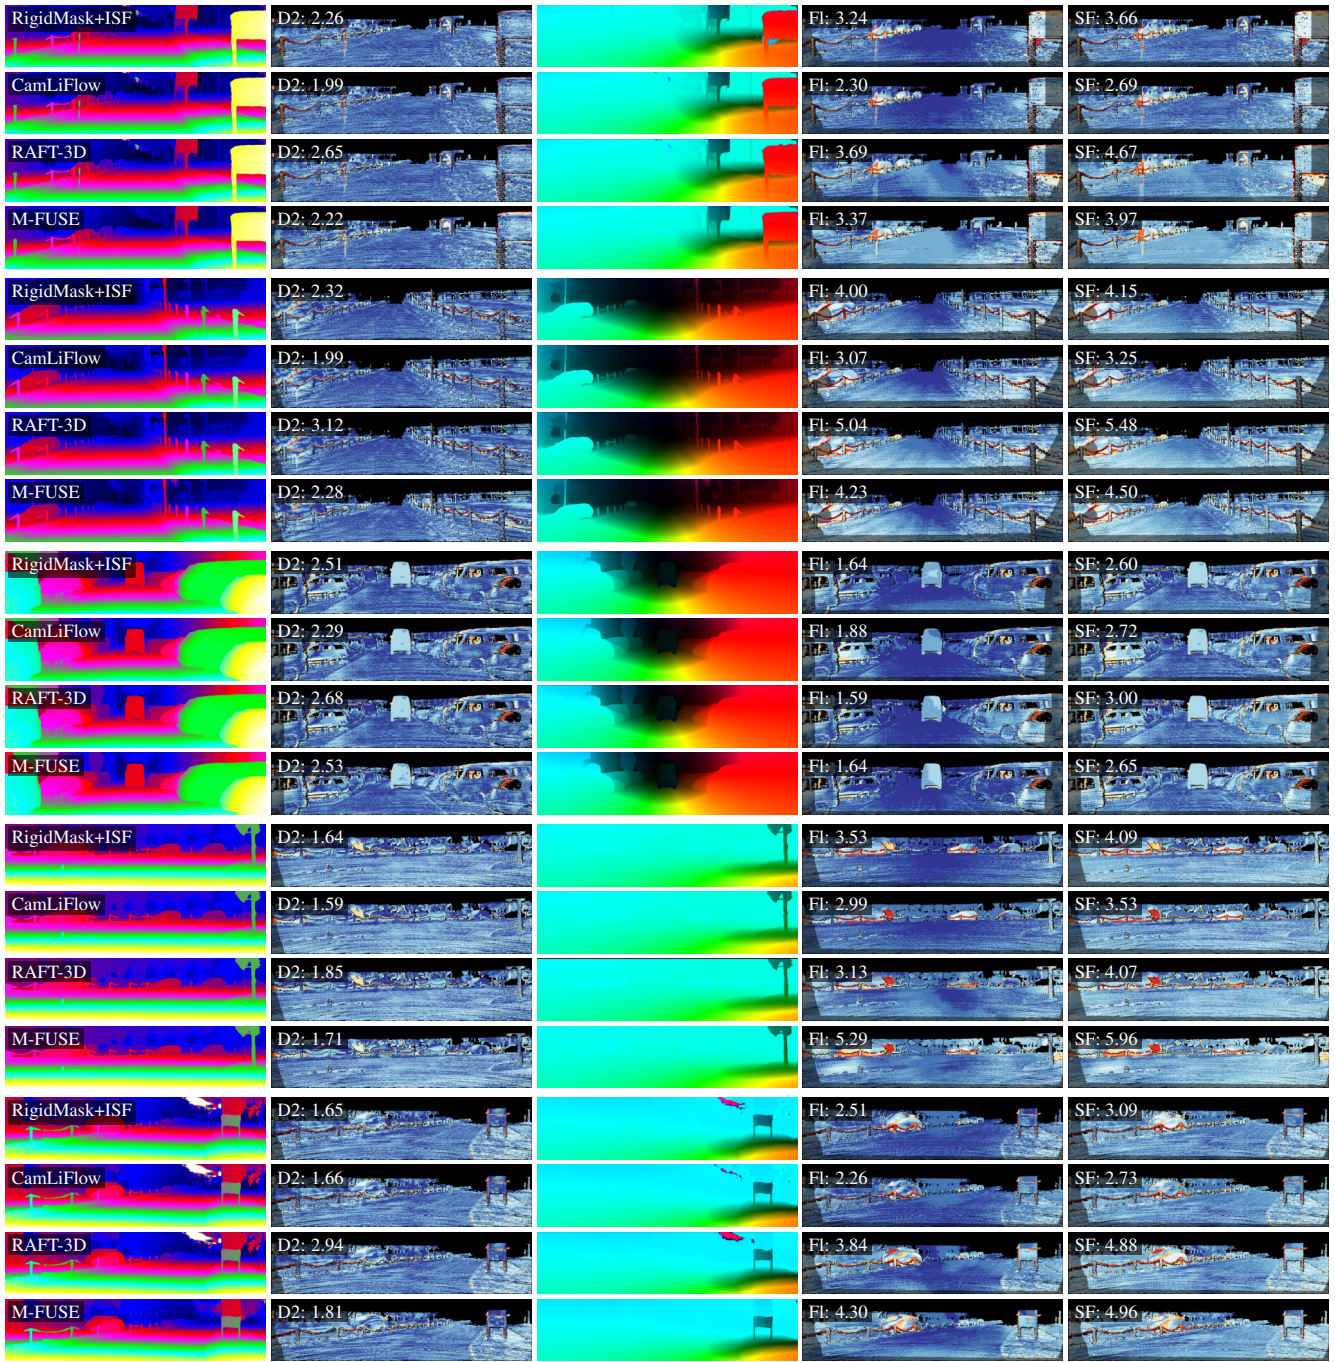

Figure 2. Qualitative comparison of our method, the original RAFT-3D, as well as the two top-performing approaches from the literature using the visualizations provided by the KITTI benchmark. *From left to right*: Target disparity visualization, corresponding  $D2$  error plot, optical flow visualization, corresponding  $Fl$  error plot, combined  $SF$  error plot.

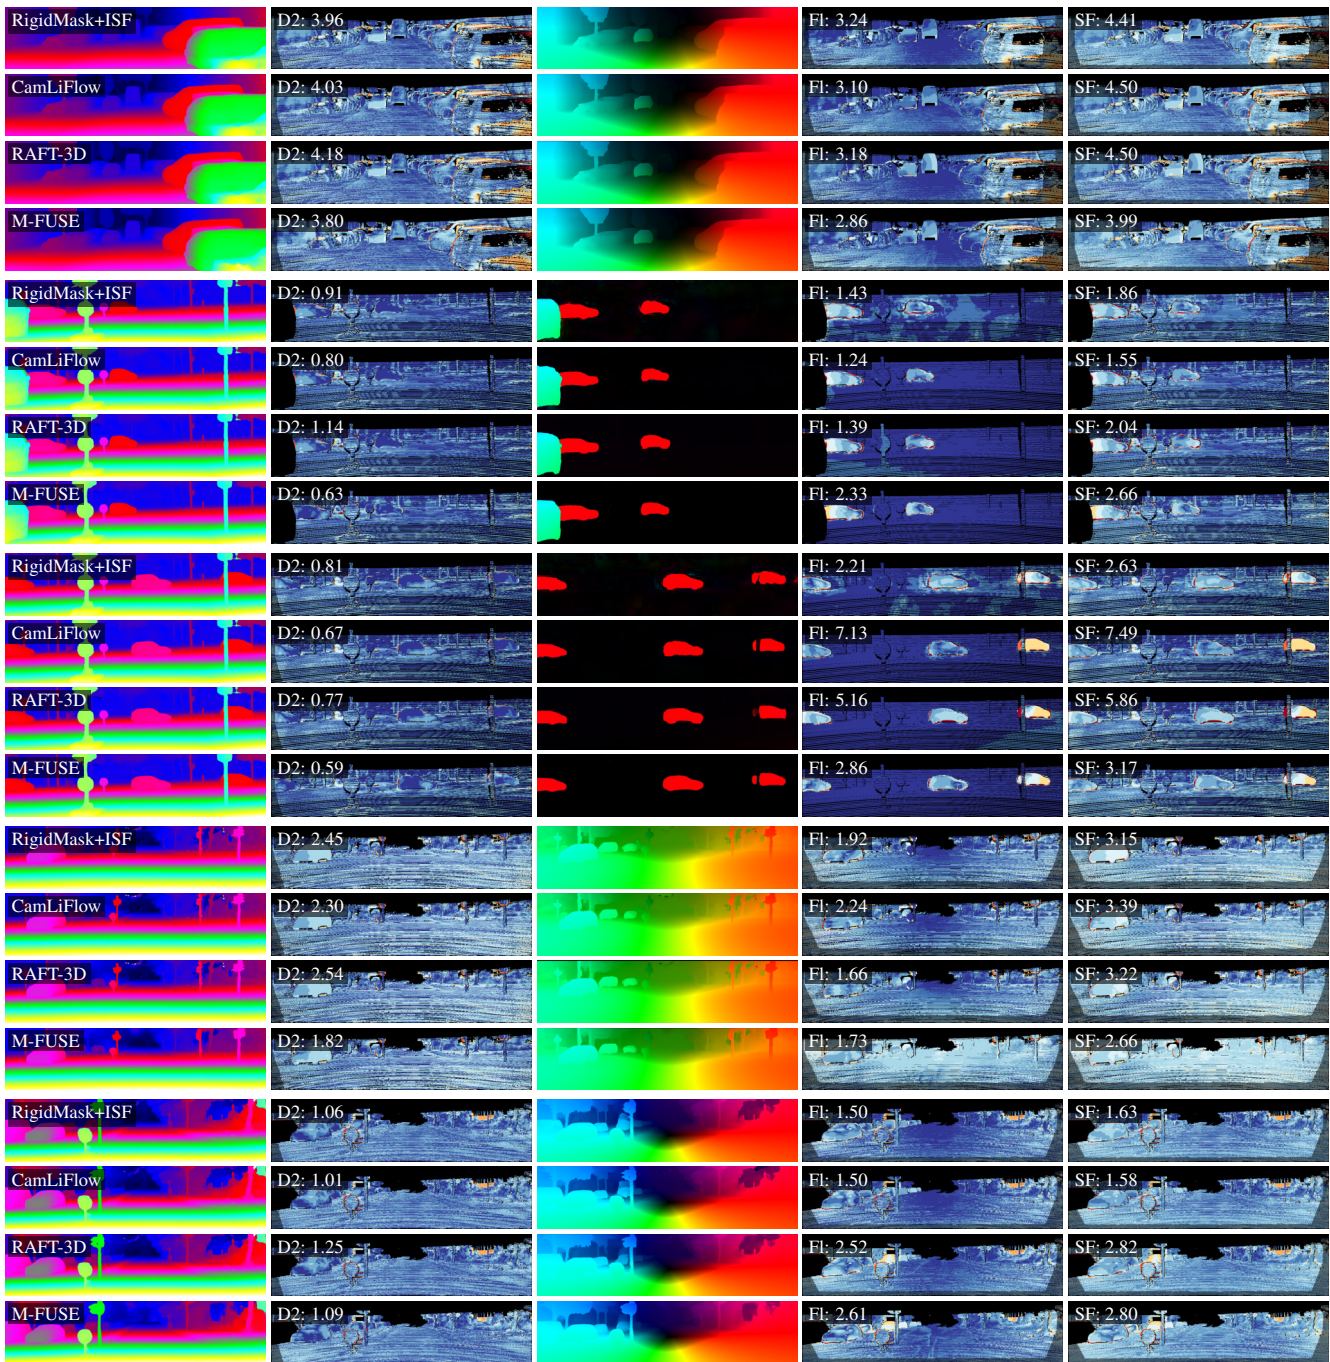

Figure 3. Qualitative comparison of our method, the original RAFT-3D, as well as the two top-performing approaches from the literature using the visualizations provided by the KITTI benchmark. *From left to right*: Target disparity visualization, corresponding  $D2$  error plot, optical flow visualization, corresponding  $Fl$  error plot, combined  $SF$  error plot.

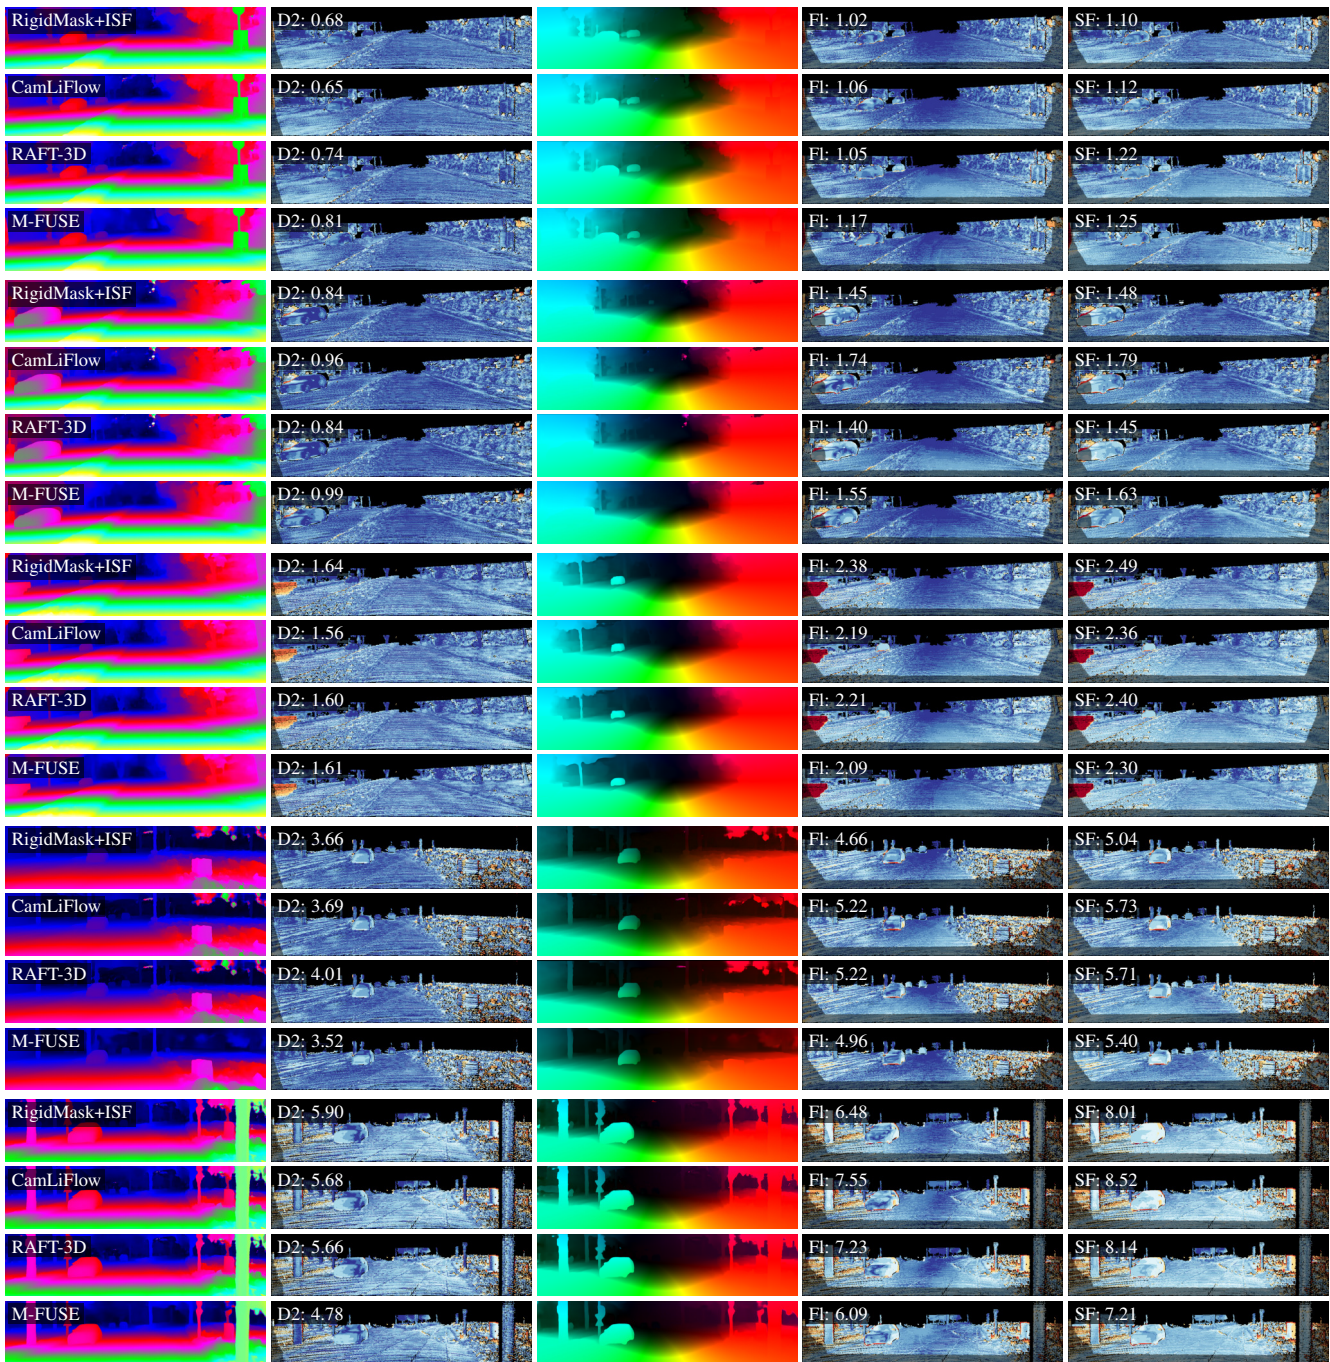

Figure 4. Qualitative comparison of our method, the original RAFT-3D, as well as the two top-performing approaches from the literature using the visualizations provided by the KITTI benchmark. *From left to right*: Target disparity visualization, corresponding  $D2$  error plot, optical flow visualization, corresponding  $Fl$  error plot, combined  $SF$  error plot.

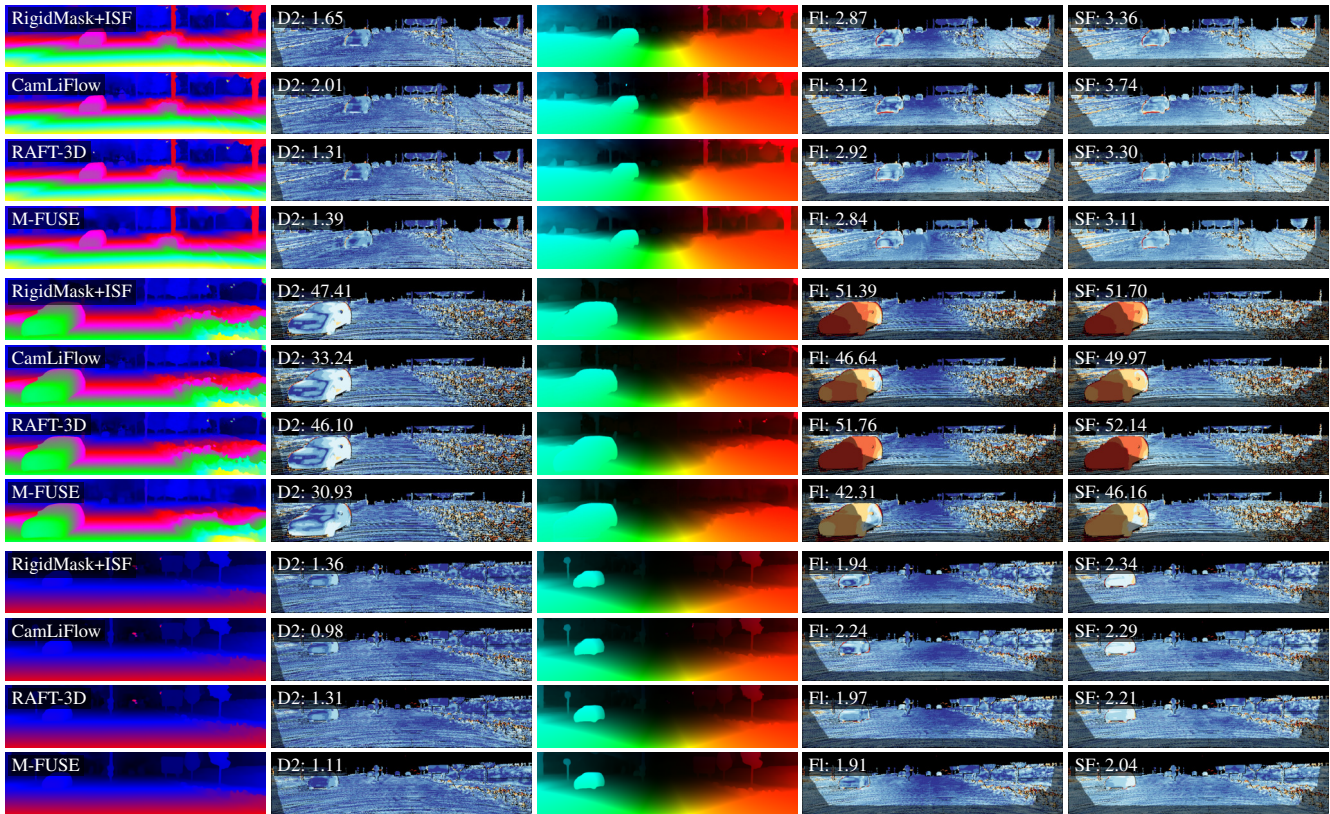

Figure 5. Qualitative comparison of our method, the original RAFT-3D, as well as the two top-performing approaches from the literature using the visualizations provided by the KITTI benchmark. *From left to right*: Target disparity visualization, corresponding  $D2$  error plot, optical flow visualization, corresponding  $Fl$  error plot, combined  $SF$  error plot.
